# Supplementary material
Source: PubMed Central journal article supplement (PMC6462243)
Supplement: NIHMS1518252-supplement-1.pdf [file NIHMS1518252-supplement-1.pdf]

## Fig S1

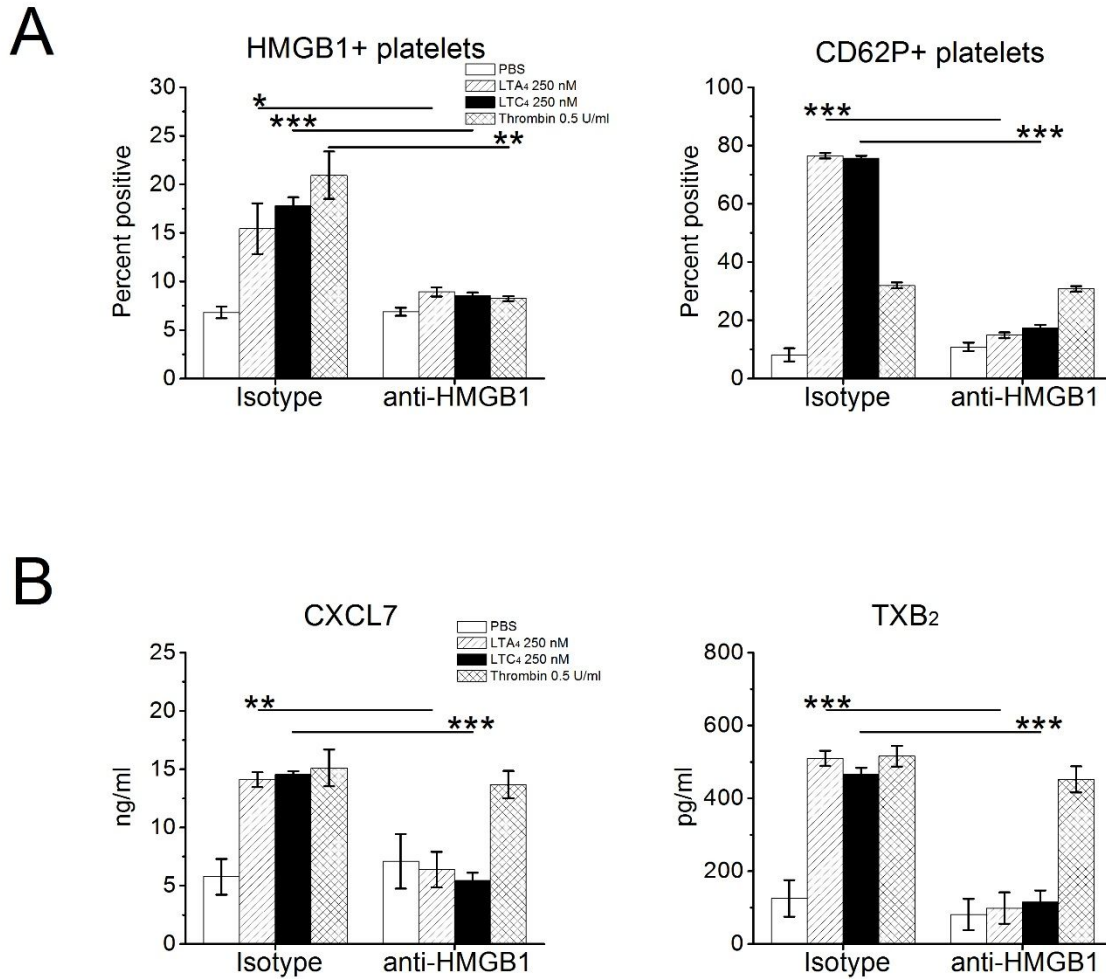

**Supplemental Figure 1.** Effect of anti-HMGB1 antibody blockade on platelet activation induced by LTA<sub>4</sub>, LTC<sub>4</sub>, or thrombin. PRP was incubated with 1 μg/ml of rabbit anti-mouse HMGB1 and stimulated with the indicated agonists for 1 hour. **A.** Surface expression of HMGB1 (left) and CD62P (right) for the indicated conditions. **B.** Levels of CXCL7 (left) and TXB<sub>2</sub> (right) in supernatants collected from the stimulated PRP. Results are from three independent experiments with three mice per group.

Fig S2

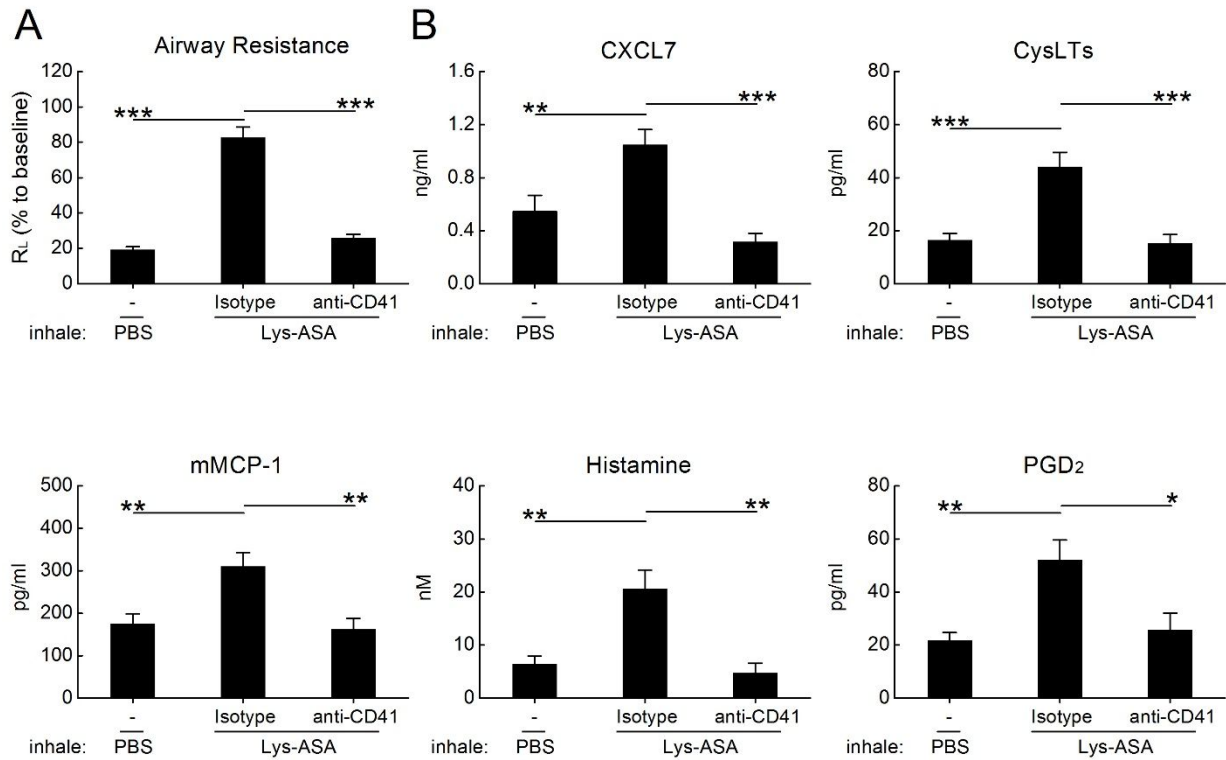

**Supplemental Figure 2. Effects of platelet depletion on Lys-ASA-induced changes in airway physiology and BAL fluid mediator content.** *Df*-primed *Ptges*<sup>-/-</sup> mice were treated with a platelet-depleting anti-CD41 Ab or isotype control 24 h prior to inhalation challenges with Lys-ASA or PBS. **A.** Maximum changes in  $R_L$  from baseline in the indicated groups of mice. **B.** BAL fluid concentrations of the indicated mediators from the same mice as in **A.** Results are mean  $\pm$  SEM from two independent experiments using a total of 10 mice in each group.

# Fig S3

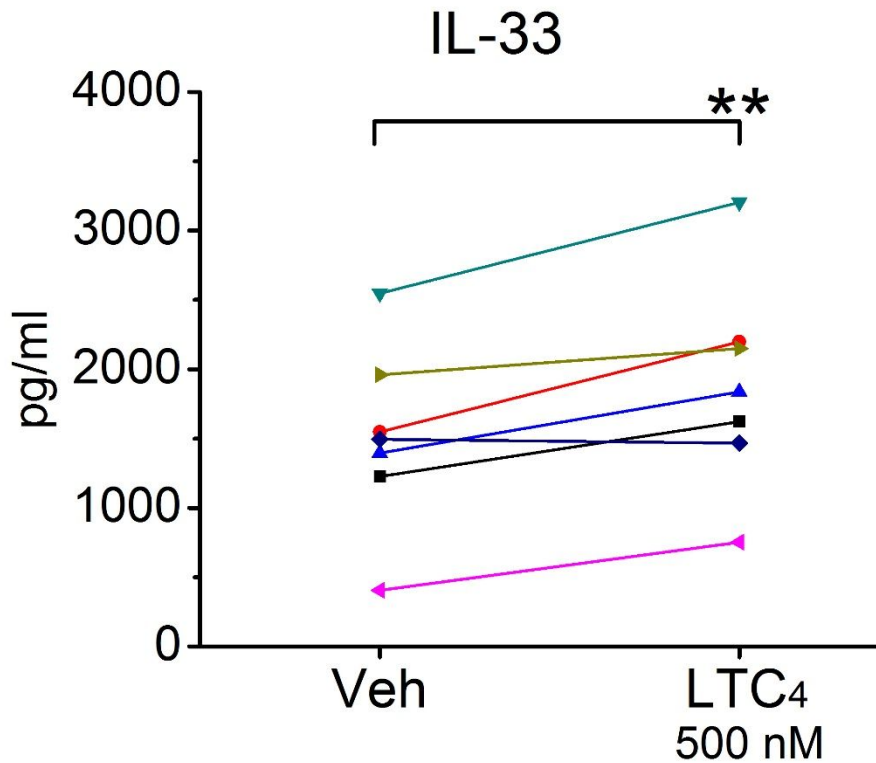

**Supplemental Figure 3.** LTC<sub>4</sub>-induced Release of IL-33 from nasal polyp fragments. Freshly excised polyp tissue was divided into fragments of 10 mg/each. Duplicate samples were stimulated for 1 h in media containing equivalent volumes of either vehicle or alone or 500 nM LTC<sub>4</sub>. Results for each data point are the averages of replicates for seven individuals. \*\*P = .006 for paired T test.

**Fig S4**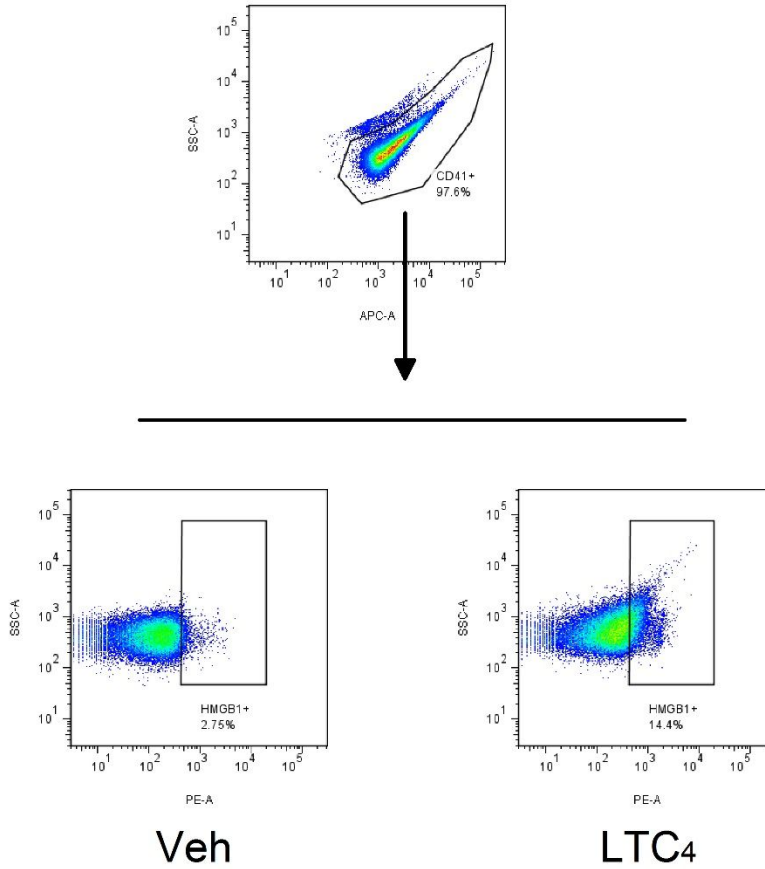

**Supplemental Figure 4.** Gating strategy for platelet staining of surface HMGB1. Platelet-sized events were stained for CD41 (top) and isotype control. HMGB1 surface staining of the CD41+ gate is shown for samples stimulated with vehicle (bottom left) or LTC<sub>4</sub> (bottom right) for a representative sample.
